# Supplementary material for: A hollow porous magnetic nanocarrier for efficient near-infrared light- and pH-controlled drug release
Source: Royal Society of Chemistry journal article supplement (doi:10.1039/c4ra07573k), 2014-01-01
Supplement: c4ra07573k1.pdf [file c4ra07573k1.pdf]

## **A hollow porous magnetic nanocarrier for efficient near-infrared light- and pH- controlled drug release**

Weidong Ji <sup>a</sup>, Najun Li\* <sup>a,c</sup>, Dongyun Chen <sup>a</sup>, Yang Jiao <sup>b</sup>, Qingfeng Xu <sup>a,c</sup> and Jianmei Lu\* <sup>a,c</sup>

*<sup>a</sup>Jiangsu Key Laboratory of Advanced Functional Polymer Design and Application, College of Chemistry, Chemical Engineering and Materials Science, Soochow University, Suzhou, 215123 China.*

*<sup>b</sup>School of Radiation Medicine and Protection, Medical College of Soochow University, Suzhou, Jiangsu 215123, China*

*<sup>c</sup>State Key Laboratory of Treatments and Recycling for Organic Effluents by Adsorption in Petroleum and Chemical Industry, Suzhou, 215123 China.*

\* E-mail: linajun@suda.edu.cn, lujm@suda.edu.cn; Tel./Fax: +86 (0) 512-6588 0367.

### **Supplementary Information**

**Table S1** GPC data of DDACMM-PEG and DDACMM-PEG-FA

| Sample Name   | RT(min) | M <sub>n</sub> | M <sub>w</sub> | M <sub>z</sub> | PDI   |
|---------------|---------|----------------|----------------|----------------|-------|
| DDACMM-PEG    | 21.412  | 101700         | 271100         | 559900         | 2.665 |
| DDACMM-PEG-FA | 21.485  | 104600         | 278000         | 573500         | 2.657 |

**Table S2** Drug loading content and drug loading efficiency

| Theoretical drug loading content (wt%) | Drug loading content (wt%) | Drug loading efficiency (%) |
|----------------------------------------|----------------------------|-----------------------------|
| 5.00                                   | 3.97                       | 79.40                       |
| 10.00                                  | 7.23                       | 72.30                       |
| 50.00                                  | 32.93                      | 65.86                       |

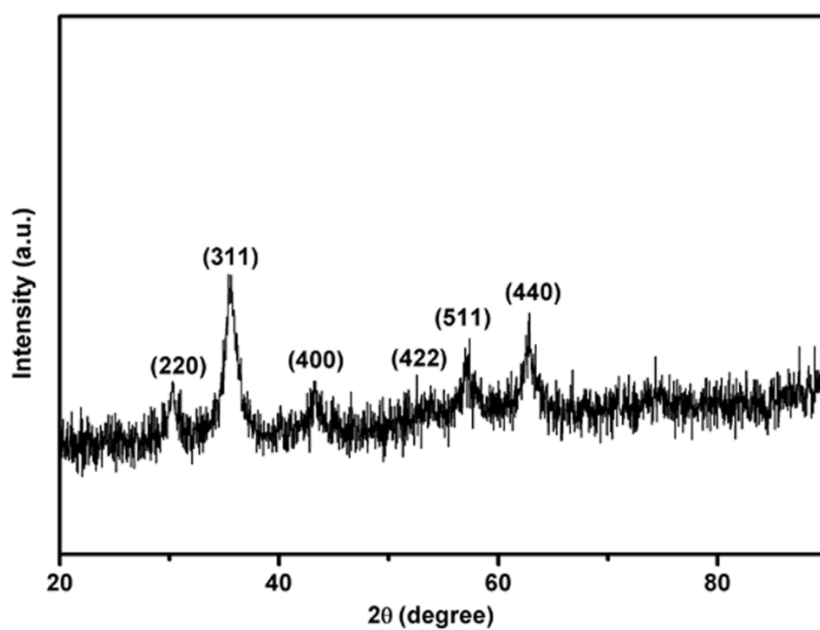**Figure S1** XRD powder pattern of HPFe<sub>3</sub>O<sub>4</sub>.

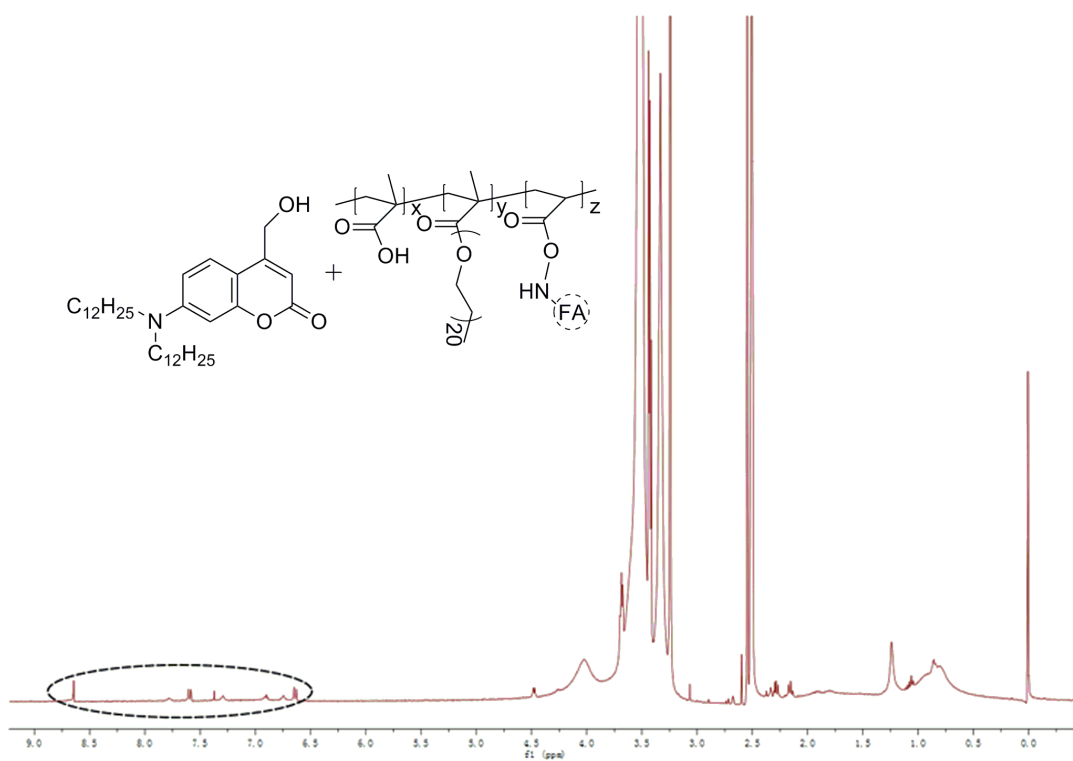

**Figure S2**  $^1\text{H}$  NMR spectrum of DDACMM-PEG-FA.

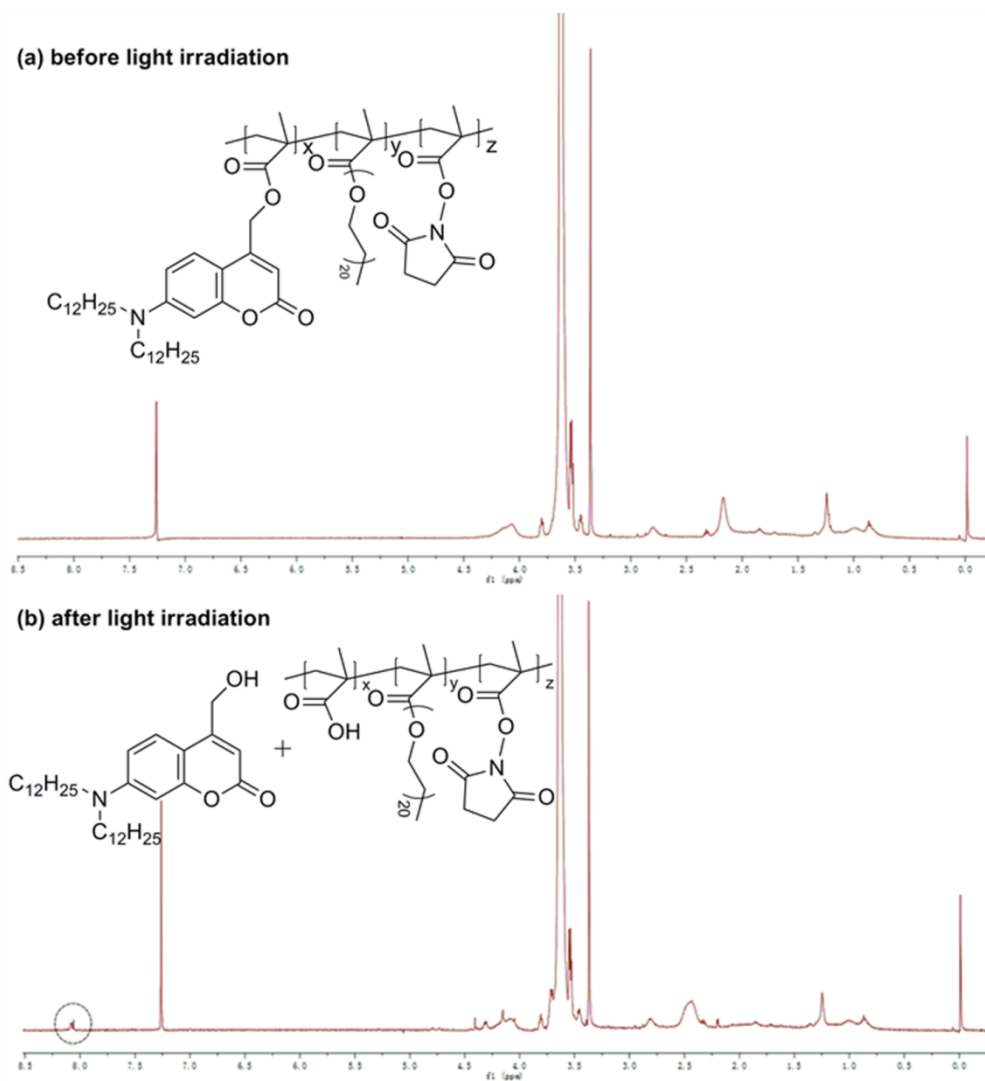

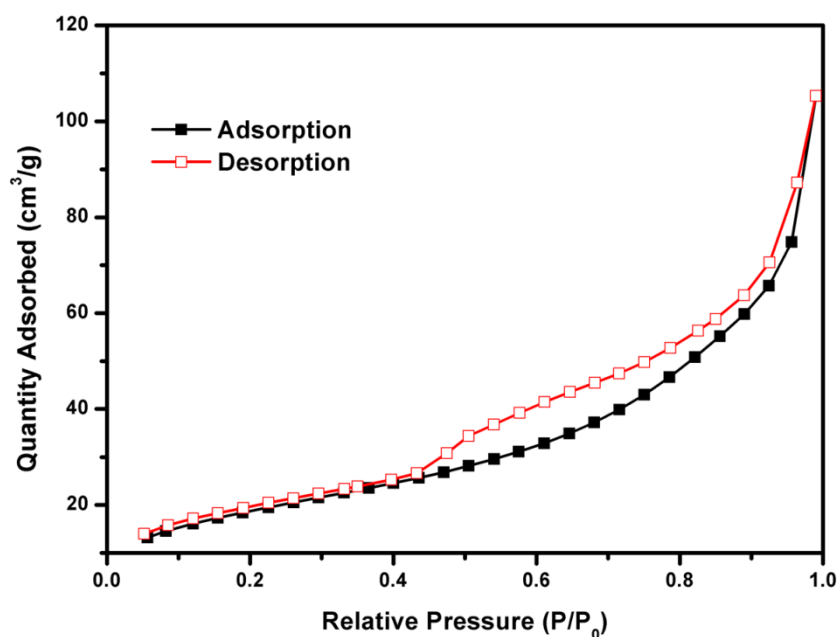

**Figure S4** N<sub>2</sub> adsorption-desorption isotherm of HPFe<sub>3</sub>O<sub>4</sub>.

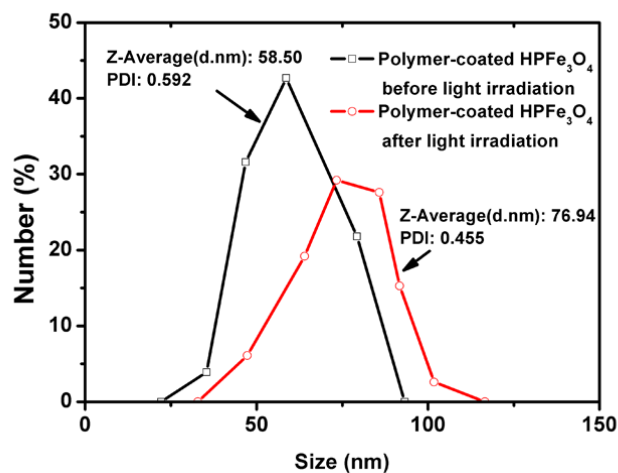

**Figure S5** DLS of polymer-coated HPFe<sub>3</sub>O<sub>4</sub> before and after 10 min irradiation using femtosecond pulse NIR laser.

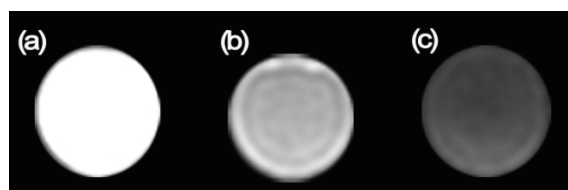

**Figure S6** T2-weight MRI of KB cells incubated with HPFe<sub>3</sub>O<sub>4</sub>-DDACMM-PEG (without FA targeting groups) (a) and HPFe<sub>3</sub>O<sub>4</sub>@DDACMM-PEG-FA (with FA targeting groups) (b) for 1h (Figure (a) as control)
